# Supplementary material for: Potential Biophysical Processes Associated with Increasing Lightning Strikes in the Arctic Region
Source: Research Square preprint supplement (doi:10.21203/rs.3.rs-6340586/v1), 2025-04-21
Supplement: Supplementary file 1 [file 38a7cb75ec7011bf73380532.docx]

Theoretical and Applied Climatology

Potential Biophysical Processes Associated with Increasing Lightning Strikes in the Arctic Region

Minjoo Kim1,2 and Eungul Lee1,2

1Department of Geography, Kyung Hee University, Seoul, Republic of Korea

2Department of Climate-Social Science Convergence, Kyung Hee University, Seoul, Republic of Korea

Corresponding author: Eungul Lee ([eungul.lee@khu.ac.kr)](mailto:eungul.lee@khu.ac.kr))

**■ Contents of this file**

- Figures S1 to S5


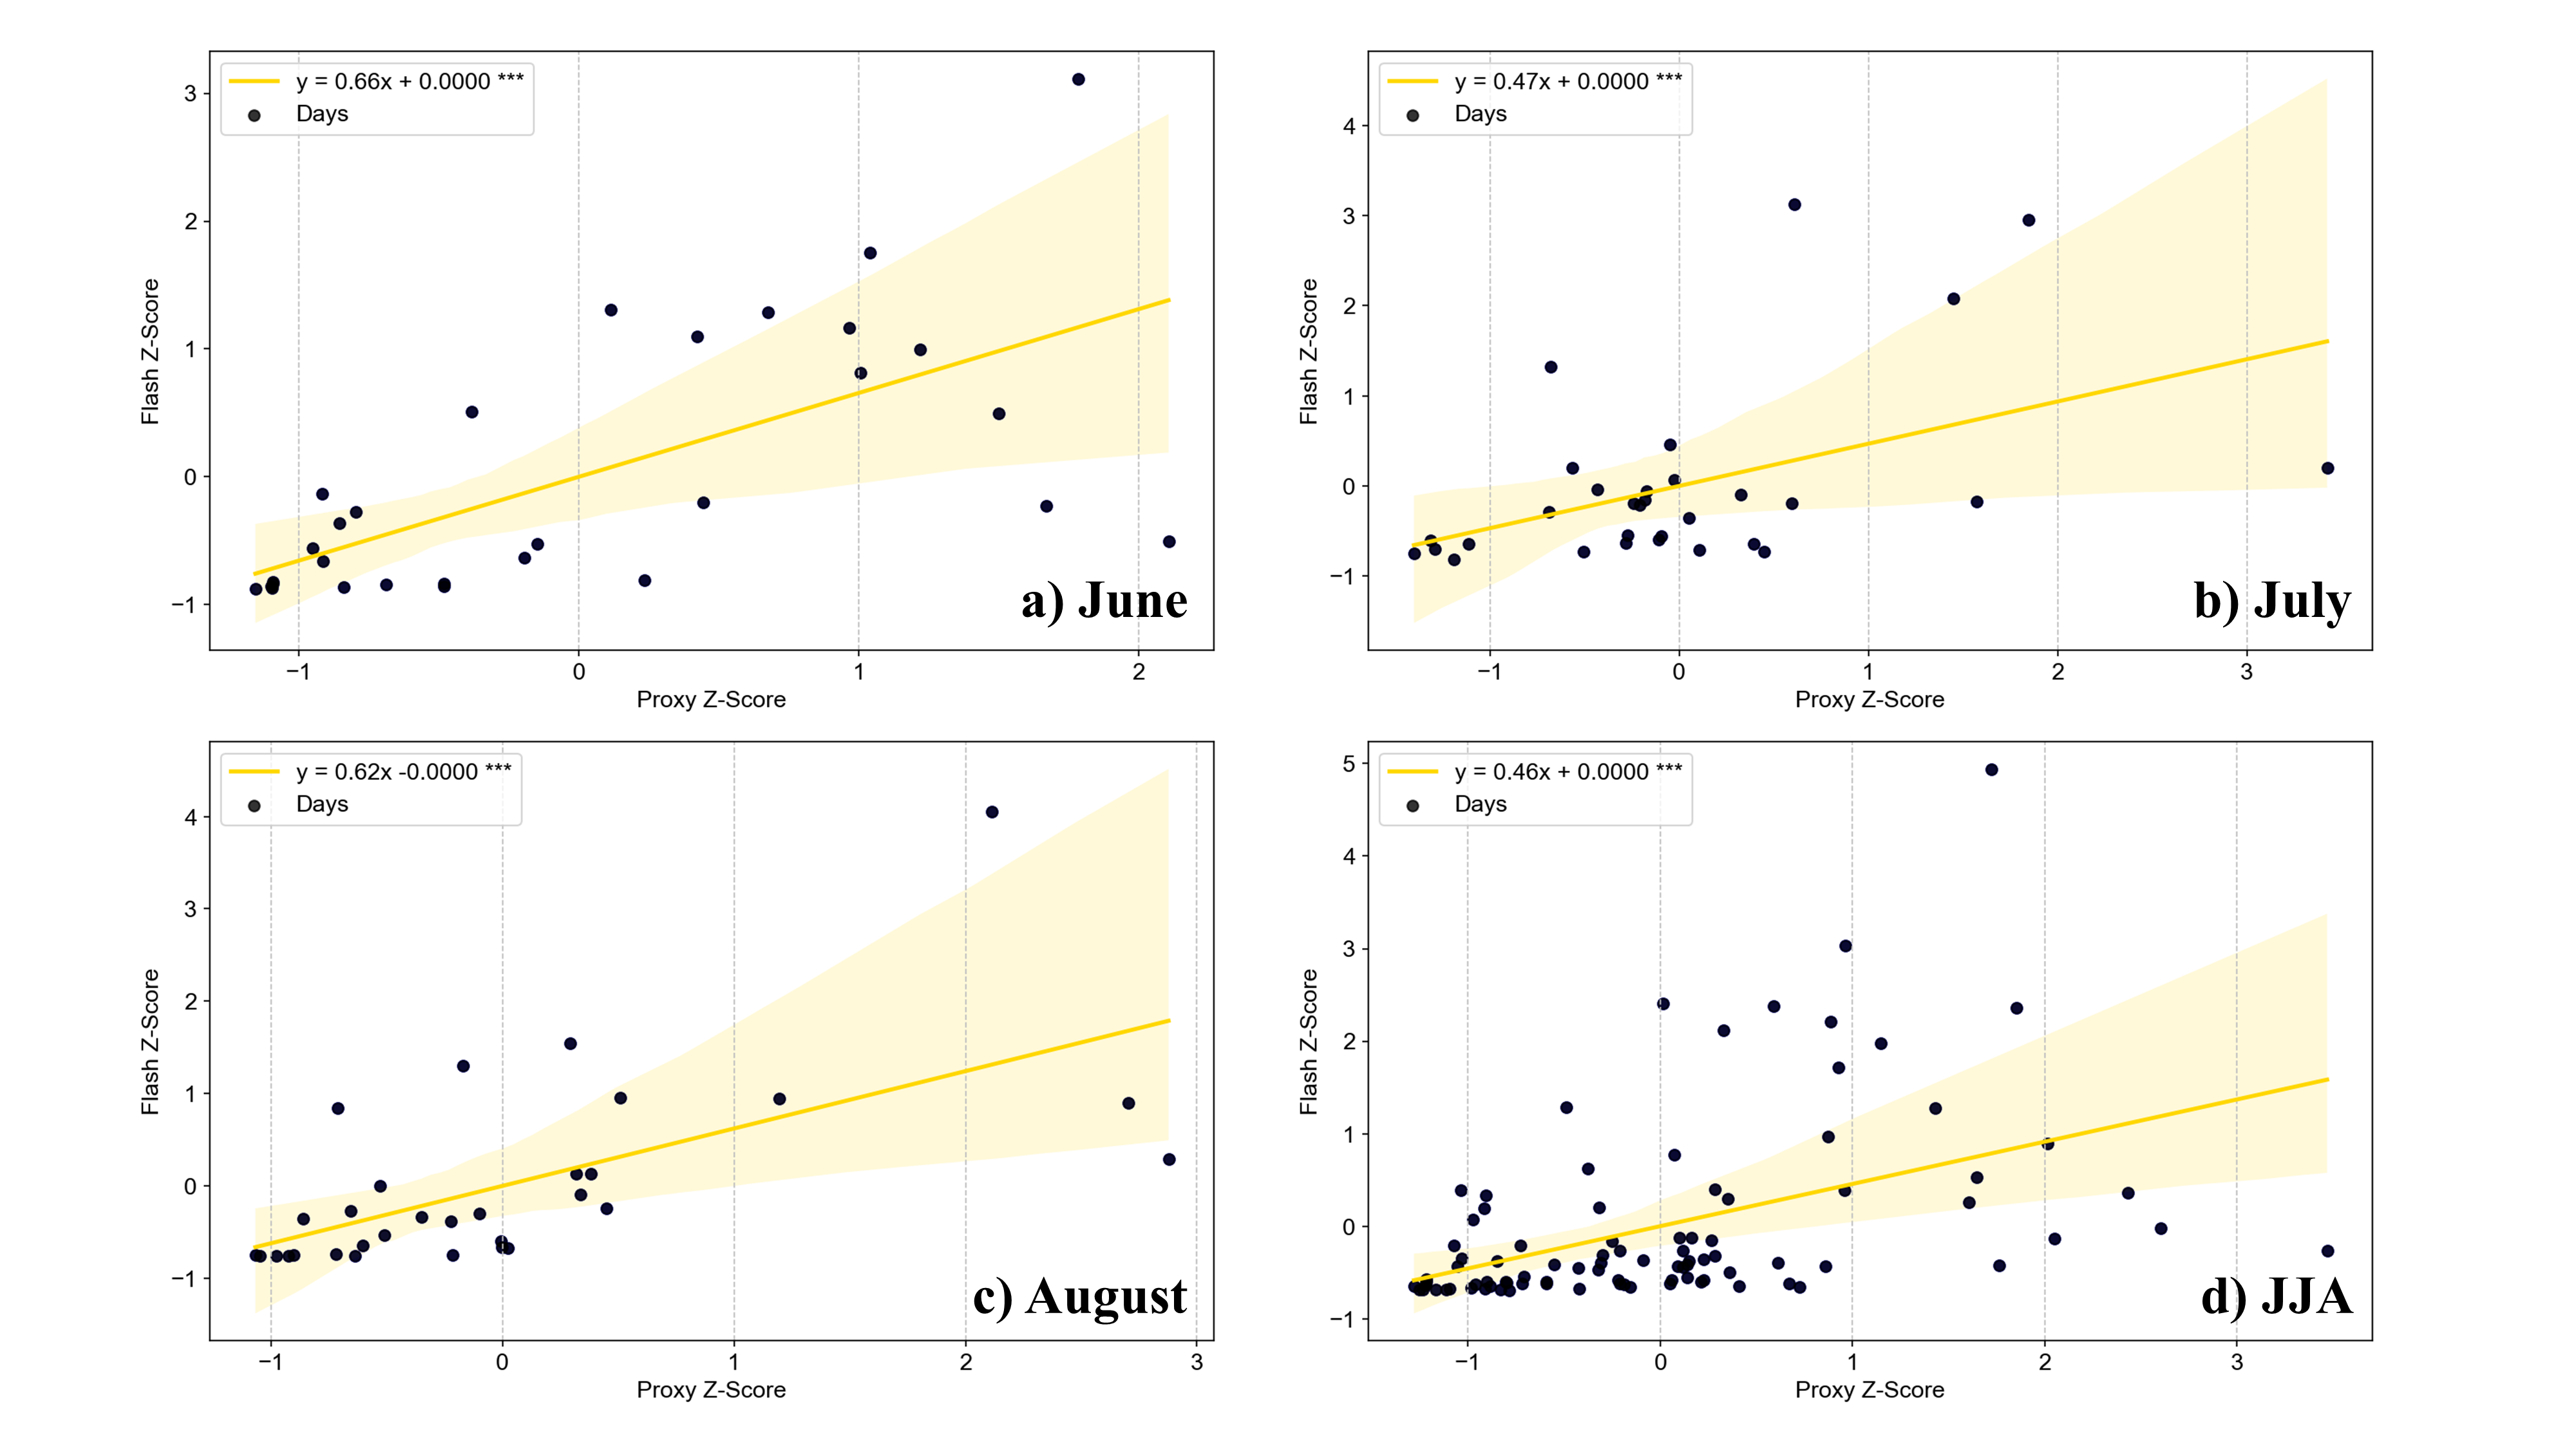


**Fig. S1** Scatter plot of lightning proxy and flash count data using Z-scores for (a) June, (b) July, (c) August, and (d) JJA with regression line (yellow line) and 95% confidence interval (yellow shaded area). *** indicates significant coefficients at the 1% level


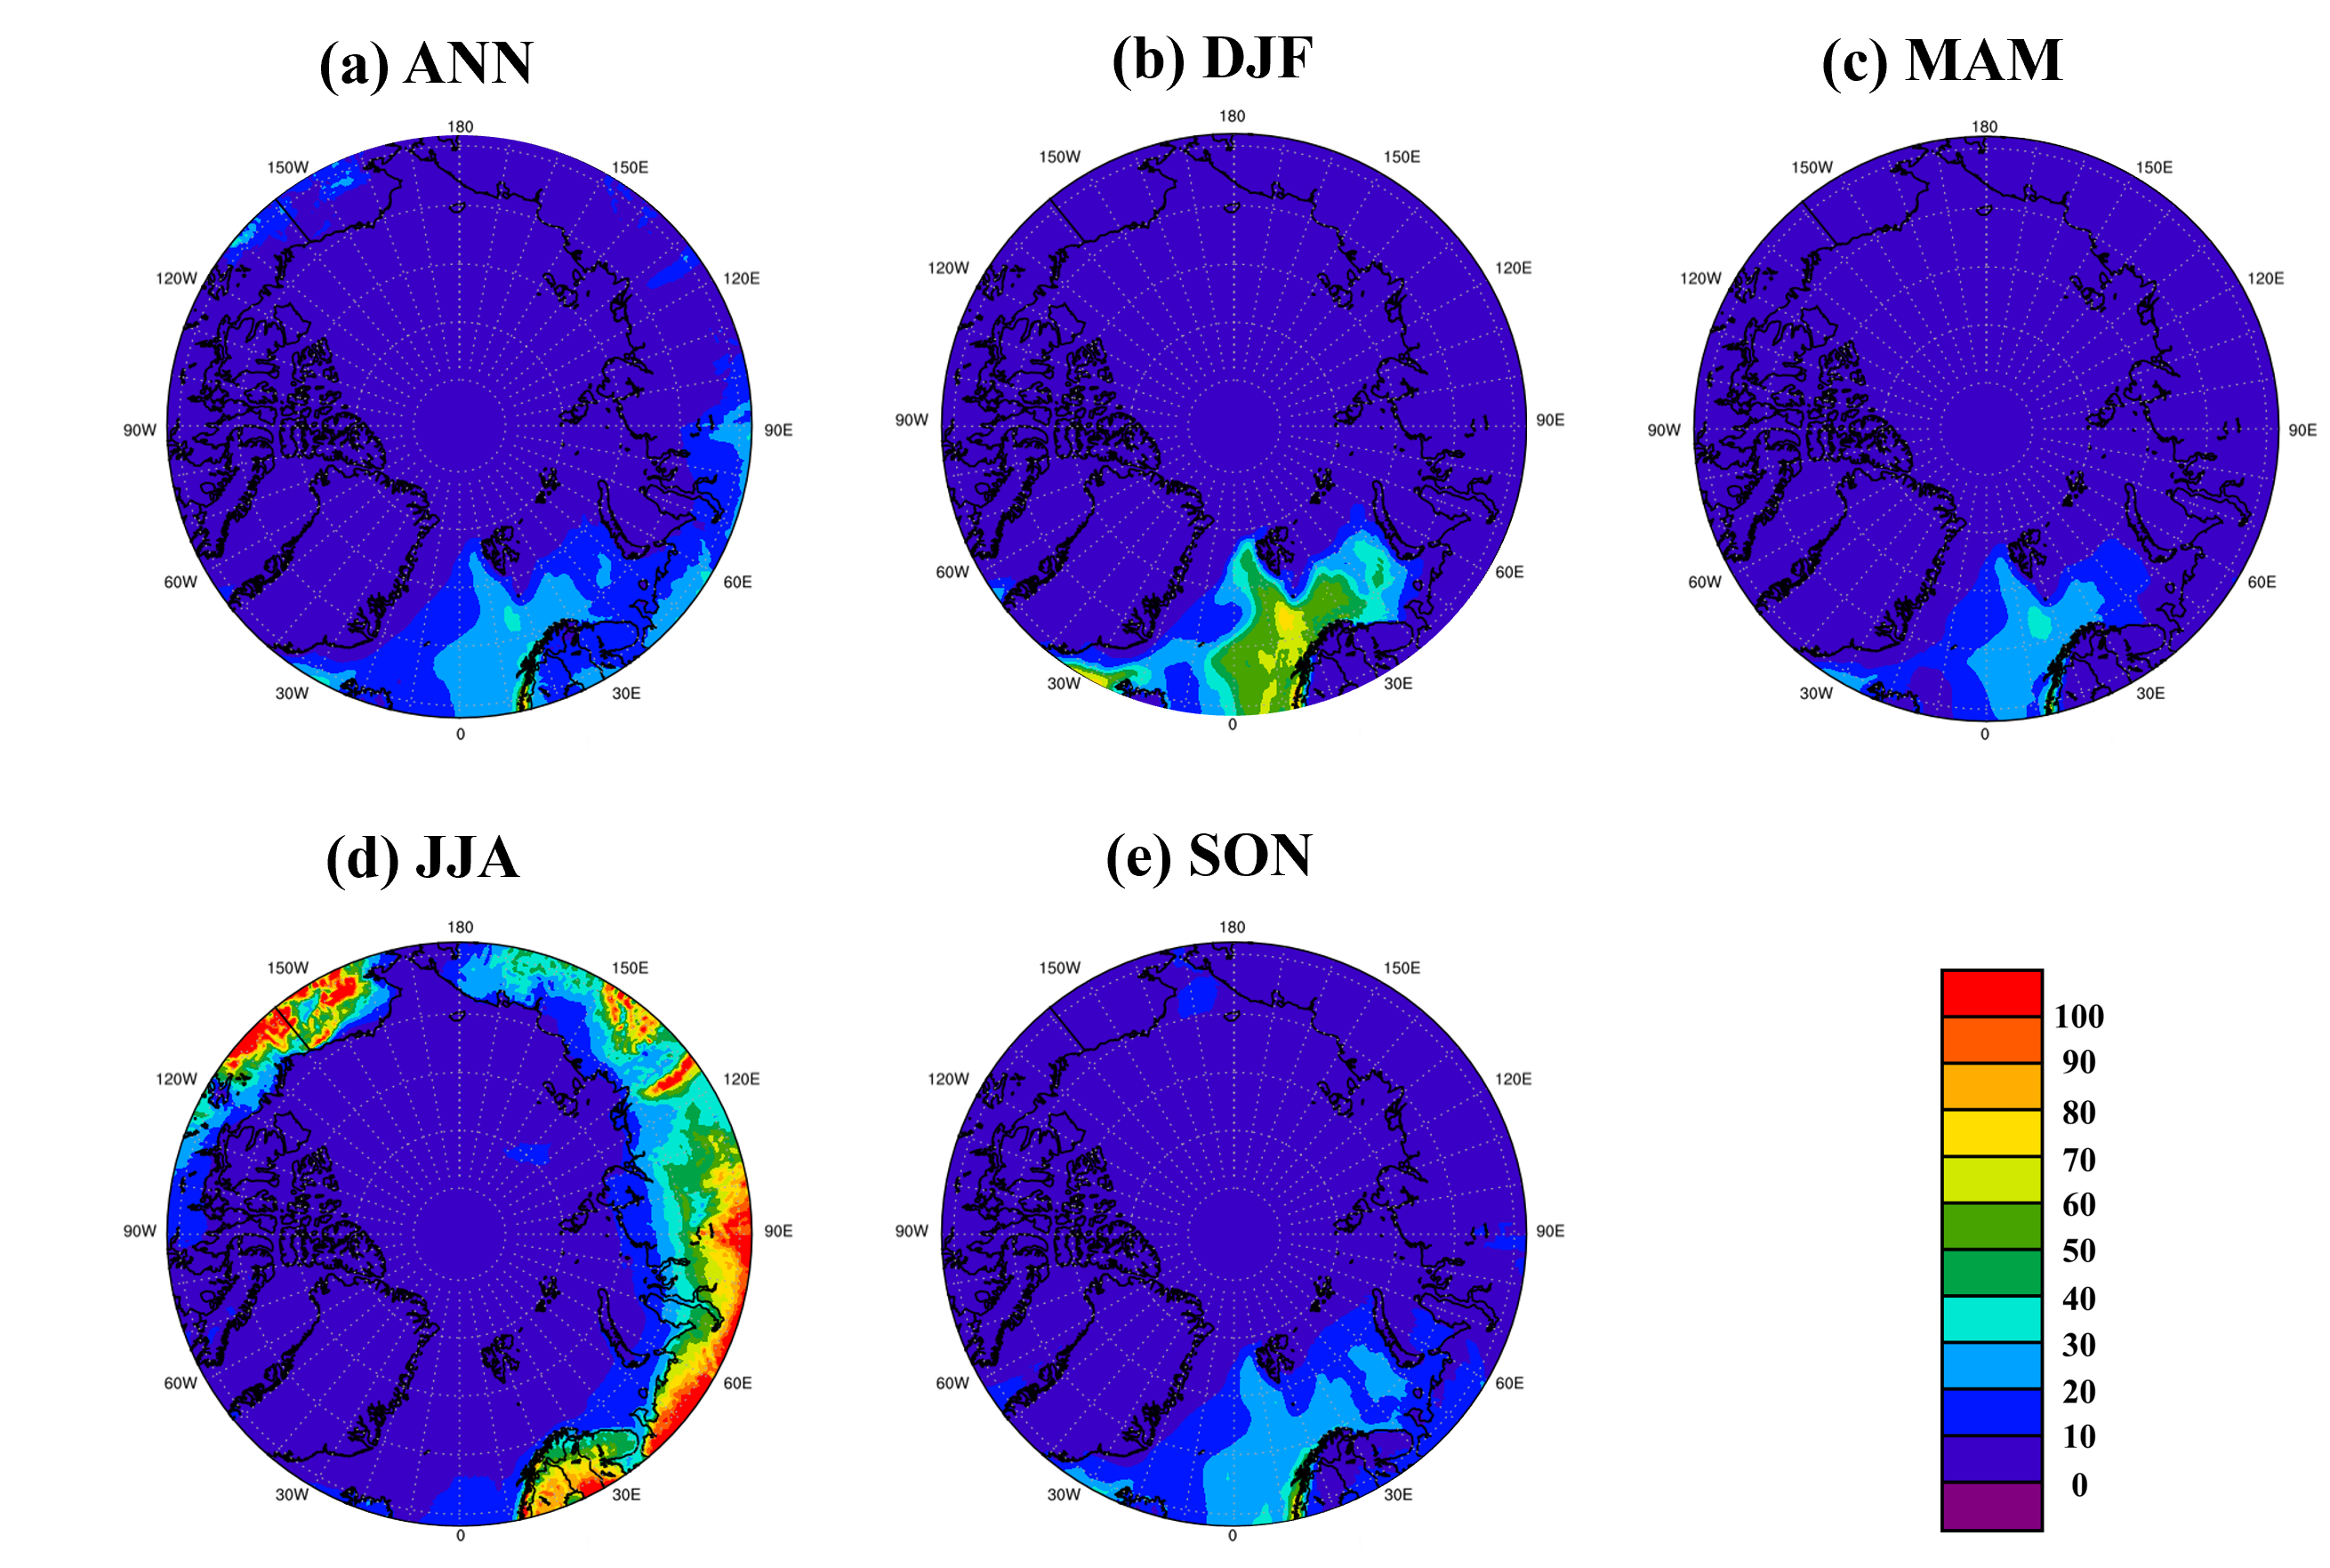


**Fig. S2** Mean lightning proxy (W/m2) of (a) annual, (b) DJF, (c) MAM, (d) JJA, and (e) SON from 1982 to 2022


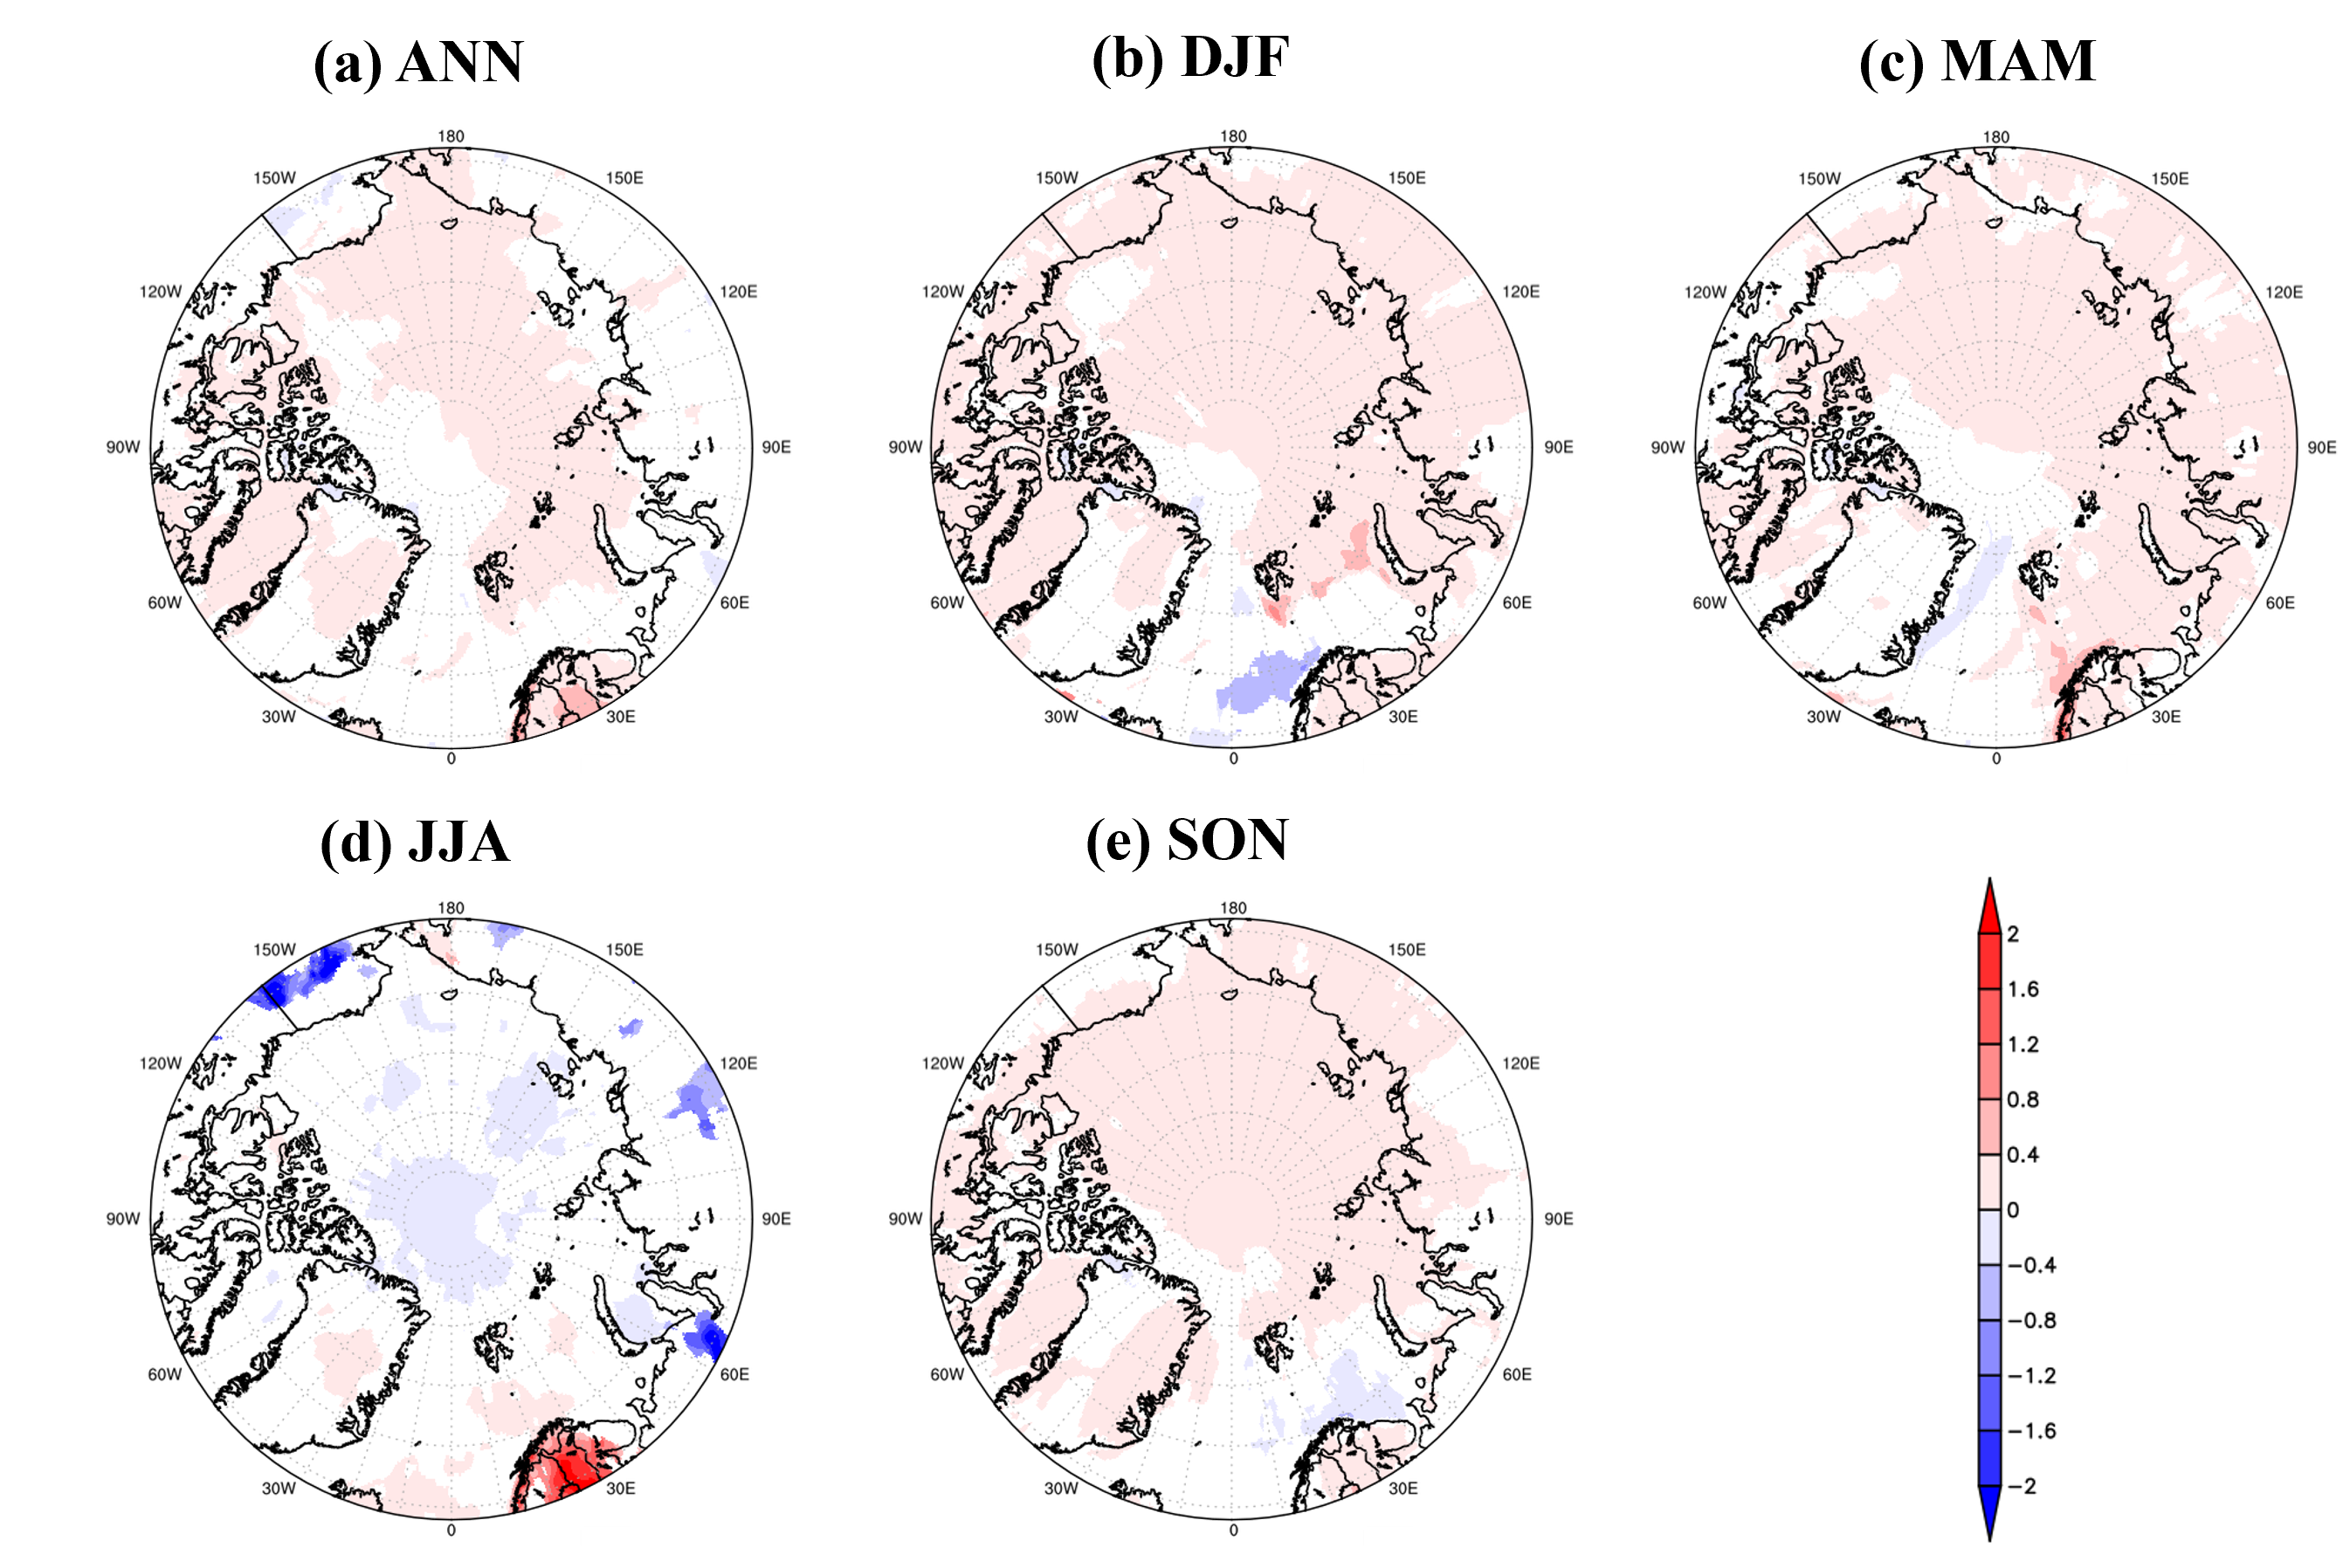


**Fig. S3** Linear regression trend (per year) of lightning proxy (W/m2) in (a) annual, (b) DJF, (c) MAM, (d) JJA, and (e) SON from 1982 to 2022. Statistically significant areas are shaded at the 10% level


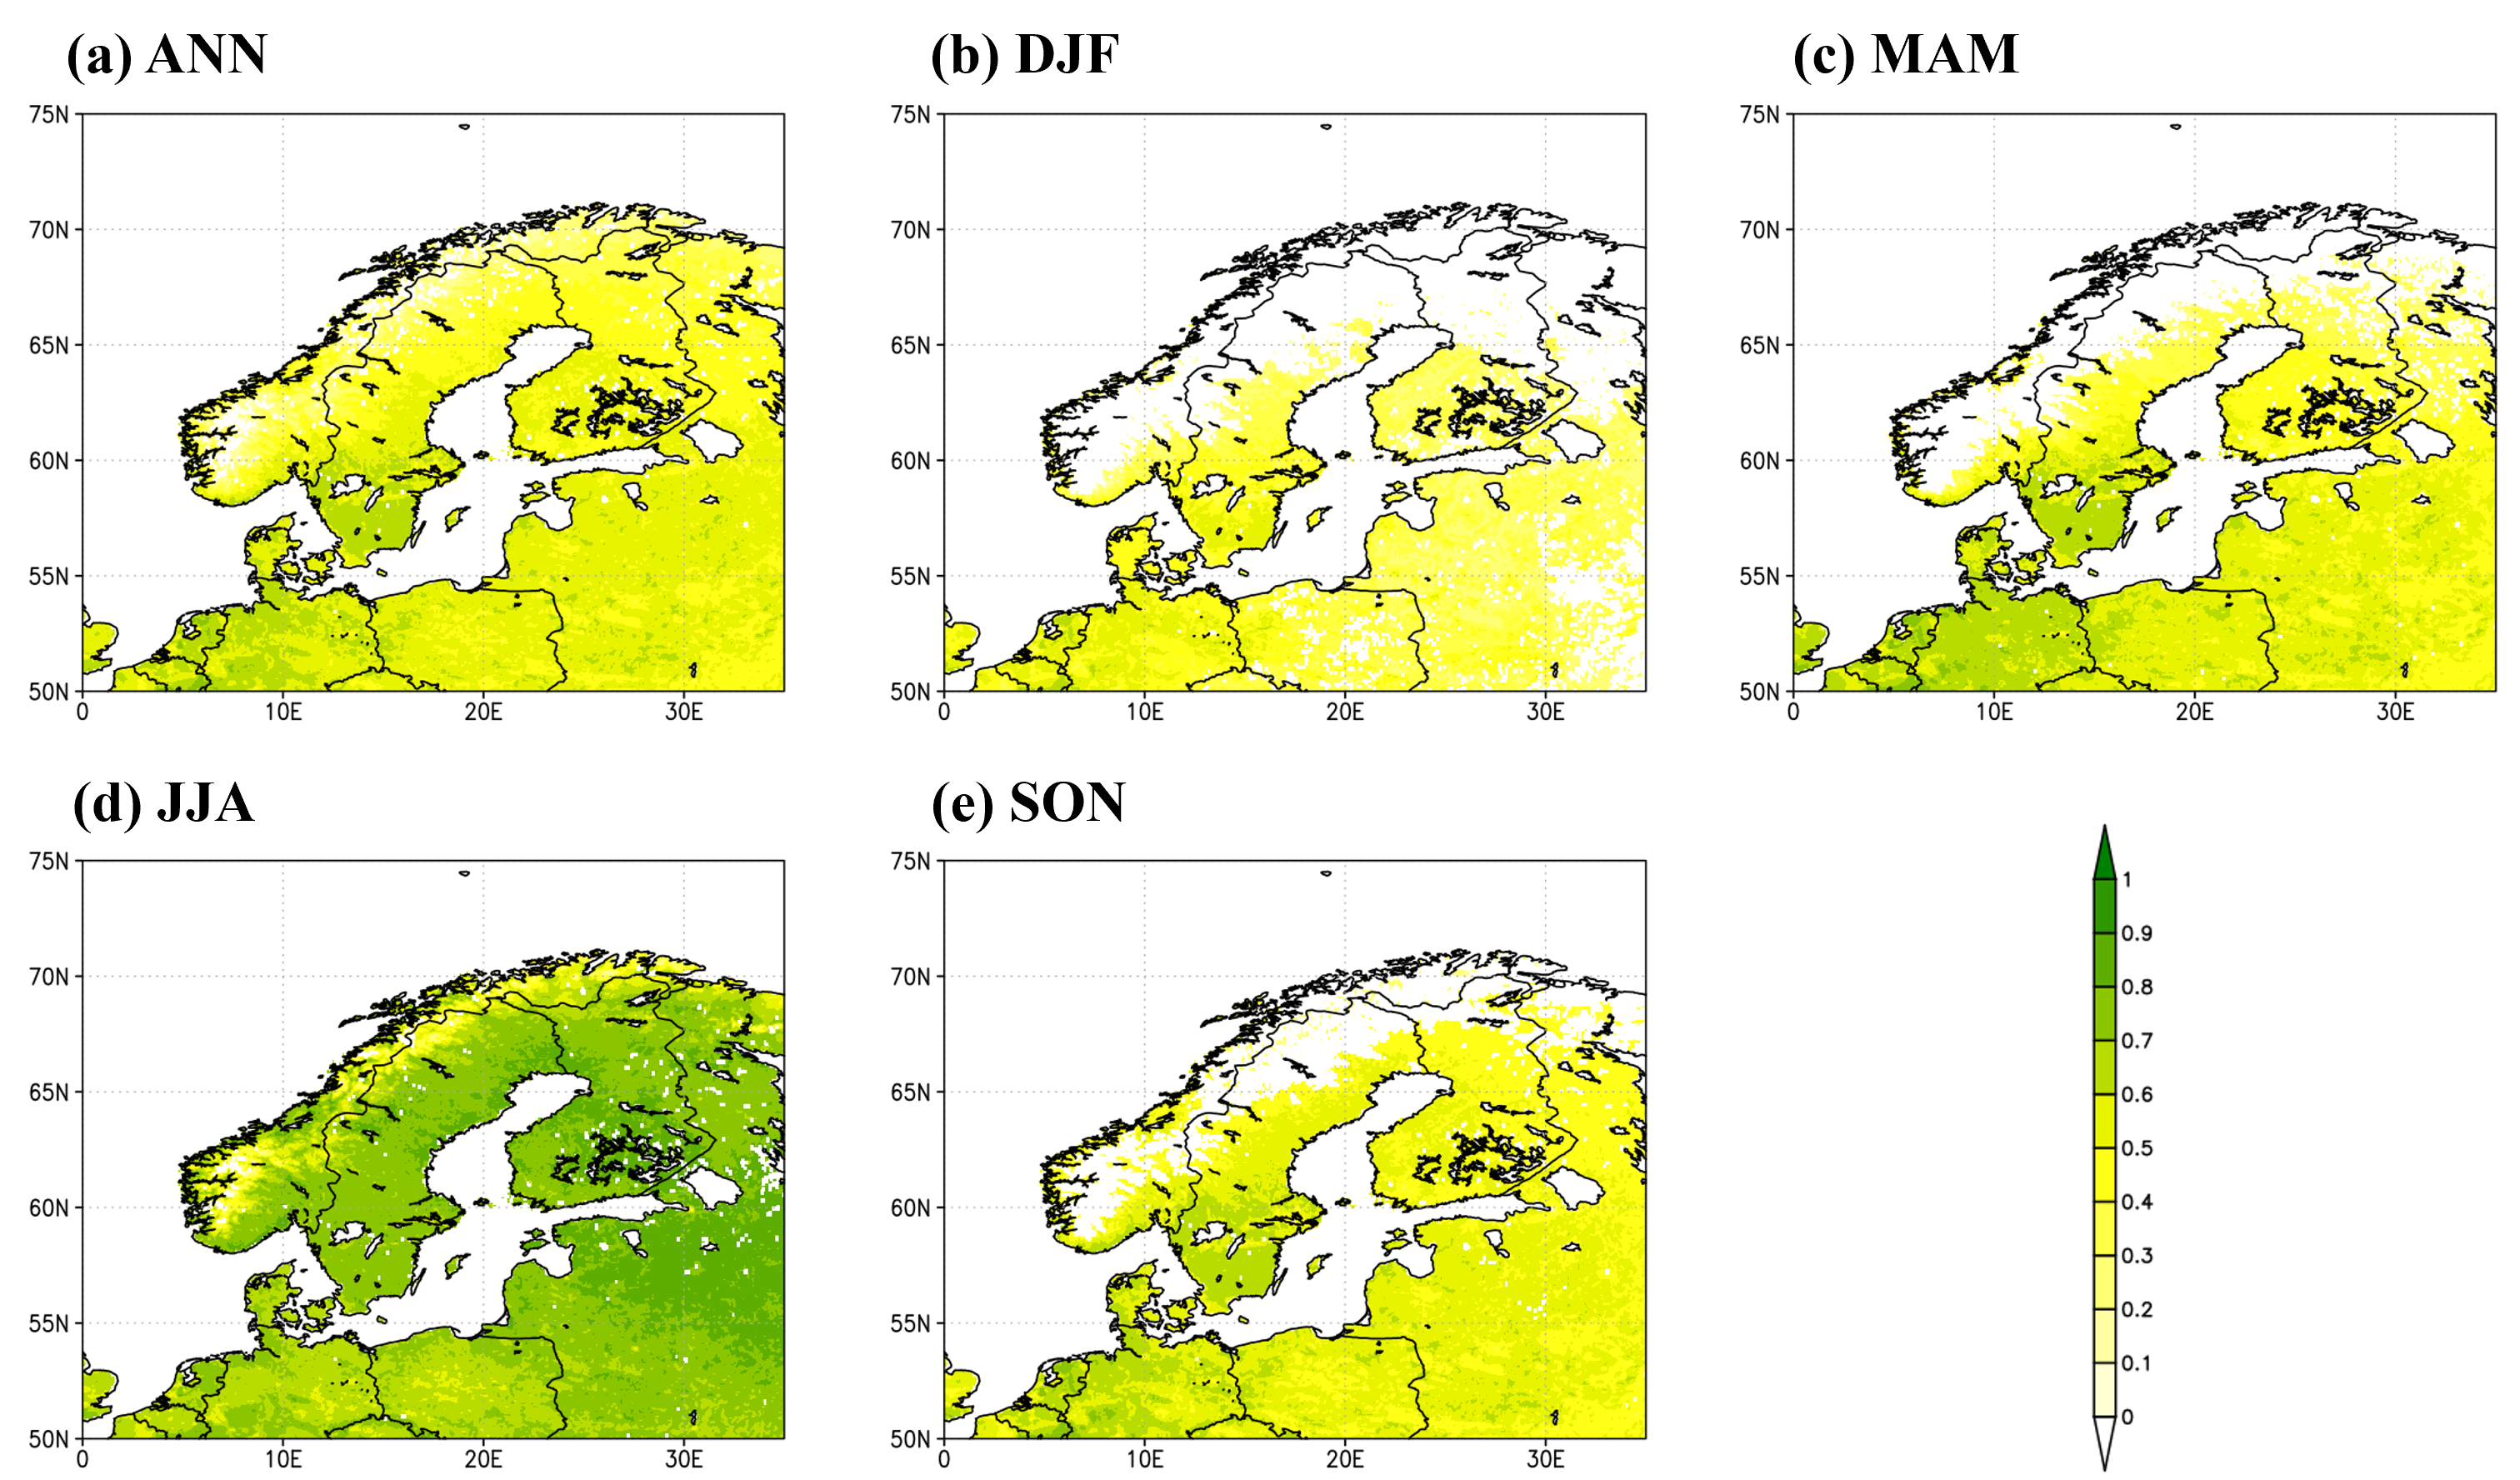


**Fig. S4** Mean NDVI of (a) annual, (b) DJF, (c) MAM, (d) JJA, and (e) SON from 1982 to 2022


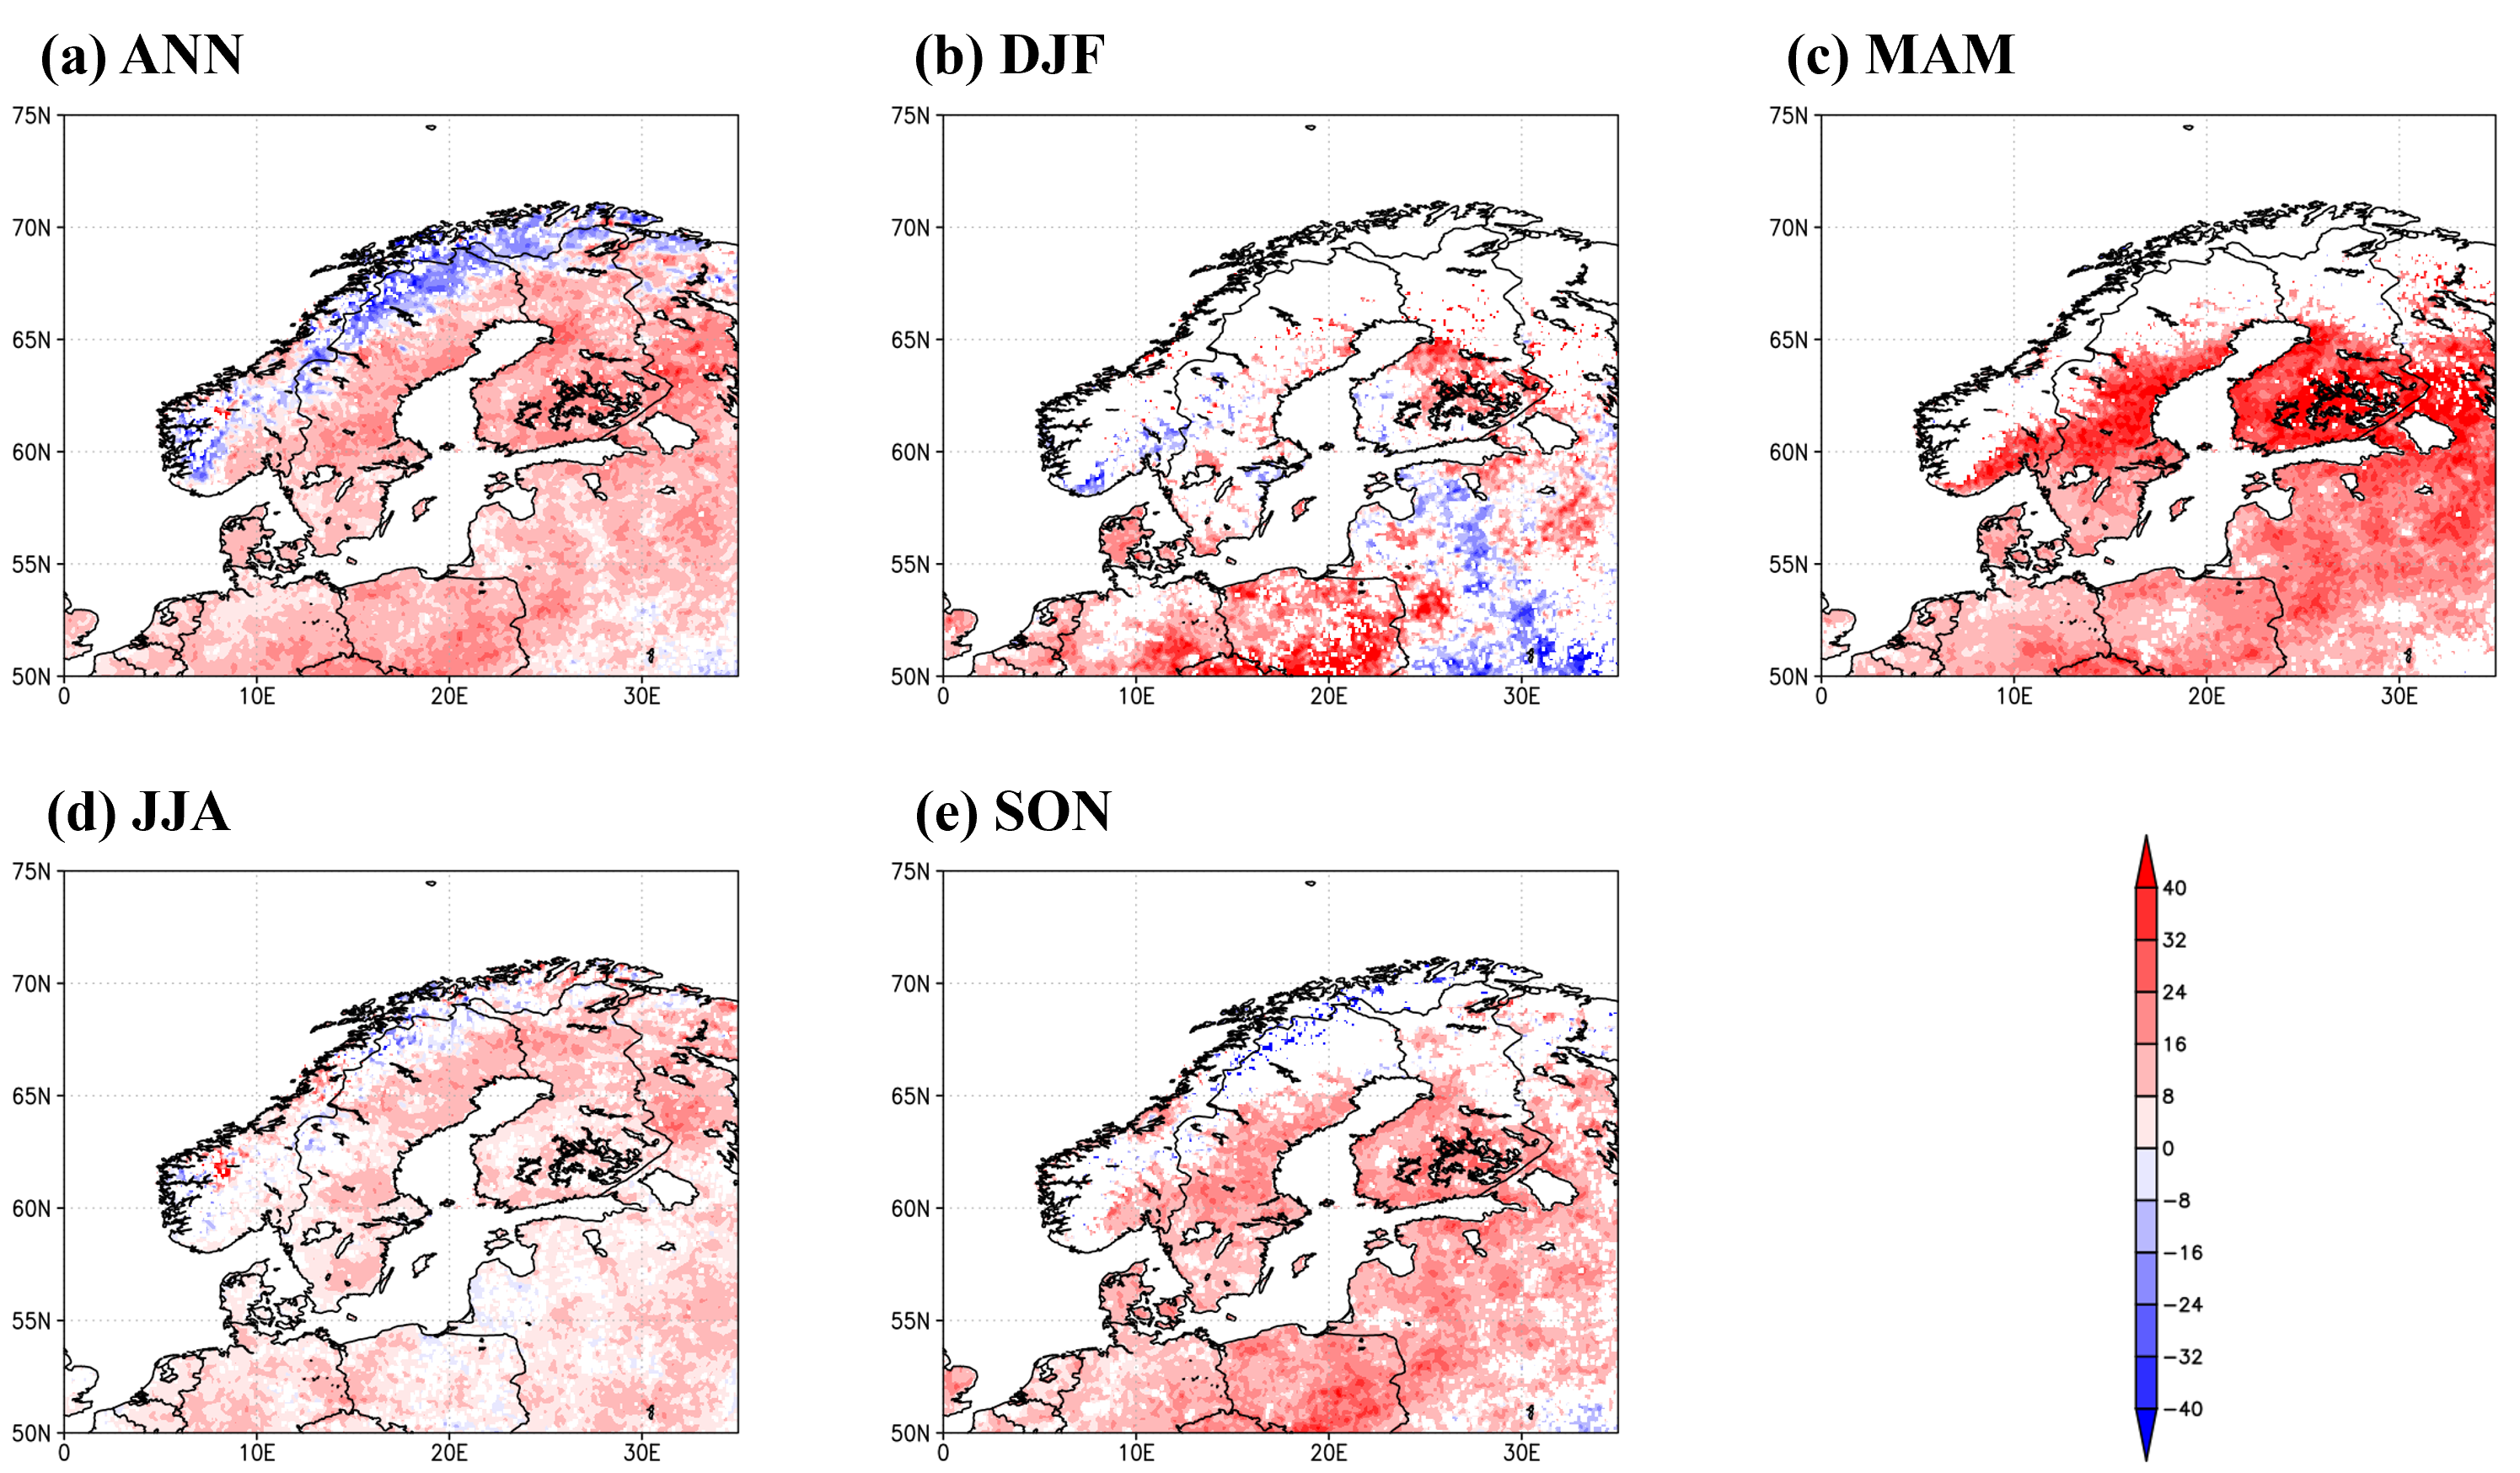


**Fig. S5** Percent of NDVI change to the mean NDVI for (a) annual, (b) DJF, (c) MAM, (d) JJA, and (e) SON during 1982-2022. Statistically significant areas are shaded at the 10% level
